# Supplementary material for: Seasonal characterization of CDOM for lakes in semiarid regions of Northeast China using excitation–emission matrix fluorescence and parallel factor analysis (EEM–PARAFAC)
Source: Copernicus journal article supplement (doi:10.5194/bg-13-1635-2016), 2016-03-17
Supplement: Supplementary file 1 [file bg-13-1635-2016-supplement.pdf]

Supplement of Biogeosciences, 13, 1635–1645, 2016  
<http://www.biogeosciences.net/13/1635/2016/>  
doi:10.5194/bg-13-1635-2016-supplement  
© Author(s) 2016. CC Attribution 3.0 License.

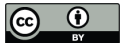

Biogeosciences  Open Access

*Supplement of*

**Seasonal characterization of CDOM for lakes in semiarid regions of Northeast China using excitation–emission matrix fluorescence and parallel factor analysis (EEM–PARAFAC)**

**Ying Zhao et al.**

*Correspondence to:* Kaishan Song (songks@iga.ac.cn)

The copyright of individual parts of the supplement might differ from the CC-BY 3.0 licence.

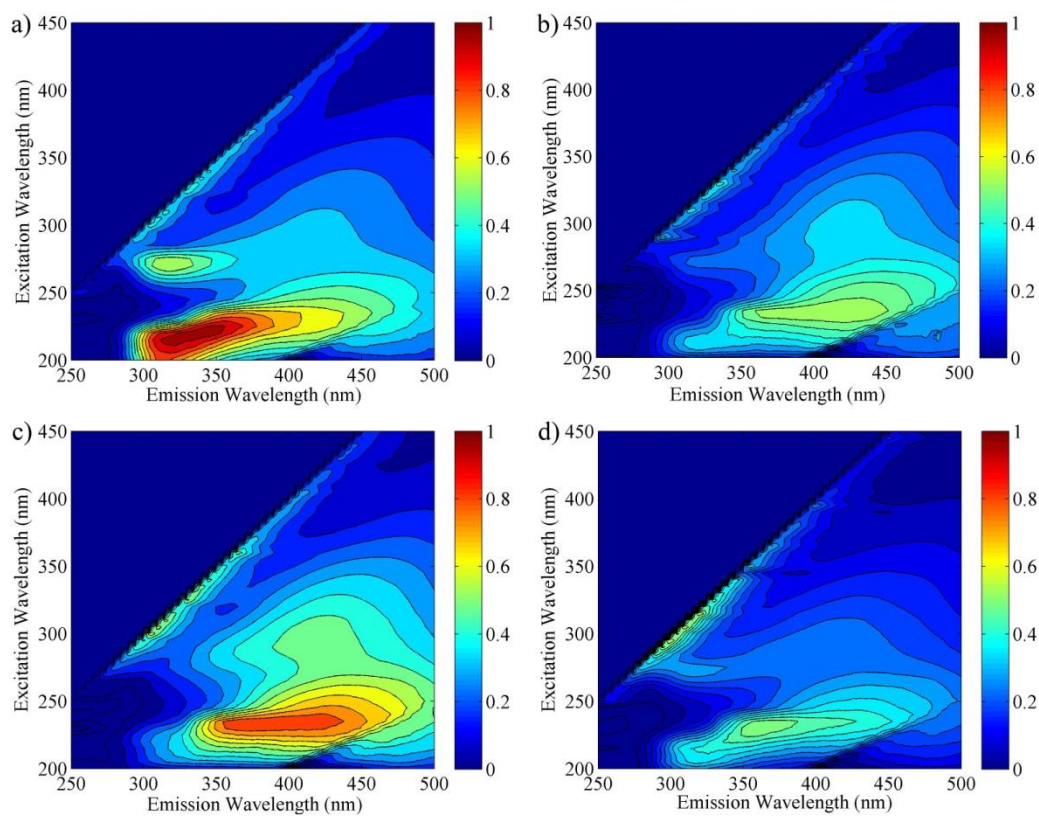

Figure S1. Examples of EEM for one water sample from Lake Xindianpao in the western part of Jilin in different seasons a) June 2013; b) August 2013; c) February 2014; d) April 2014 (Fluorescence is in Raman unit:  $\text{nm}^{-1}$ ).

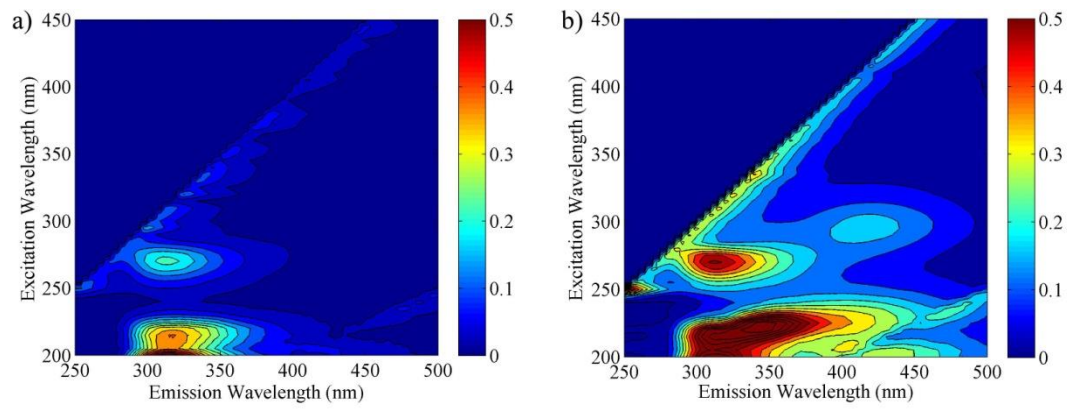

Figure S2. Representative examples of EEM for a) ice meltwater sample, and b) rainwater CDOM in the western part of Jilin (Raman:  $\text{nm}^{-1}$ ).
